# Supplementary material for: Associations of Total Body Fat Mass and Skeletal Muscle Index with All-Cause and Cancer-Specific Mortality in Cancer Survivors
Source: MDPI journal article supplement (doi:10.3390/cancers15041081), 2023-02-08
Supplement: s1 [file s1]

# Associations of total body fat mass and skeletal muscle index with all-cause and cancer-specific mortality in cancer survivors

**Table S1.** Association between WBFM and risk of all-cause mortality in subgroups of cancer survivors.

| Variables                  | Cancer survivors (N= 1682 ) |                        | p-interaction |
|----------------------------|-----------------------------|------------------------|---------------|
|                            | No. Death/Total             | aHR (95 CI)<br>Model 1 |               |
| <b>All-cause mortality</b> |                             |                        |               |
| Sex                        |                             |                        |               |
| Female                     | 387/737                     | 1.53 (0.92-2.55)       | 0.001         |
| Male                       | 281/945                     | 2.16 (1.15-4.06)       |               |
| Age (years)                |                             |                        |               |
| <65                        | 132/886                     | 2.07 (0.74-5.79)       | 0.001         |
| ≥65                        | 536/796                     | 1.84 (1.20-2.82)       |               |
| Energy intake (kcal/day)   |                             |                        |               |
| <1785                      | 361/668                     | 1.85 (1.04-3.92)       | 0.067         |
| ≥ 1785                     | 256/638                     | 2.28 (1.23-3.85)       |               |
| Comorbidity                |                             |                        |               |
| 0                          | 384/969                     | 2.21 (1.34-3.64)       | 0.554         |
| 1-4                        | 284/713                     | 1.70 (0.83-3.47)       |               |
| Sex                        |                             |                        |               |
| Female                     | 125/737                     | 1.87 (1.11-3.17)       | 0.303         |
| Male                       | 88/945                      | 1.13 (0.51-2.53)       |               |
| Age (years)                |                             |                        |               |
| <65                        | 58/886                      | 2.01 (0.51-7.97)       | 0.820         |
| ≥65                        | 155/796                     | 1.70 (1.08-2.67)       |               |
| Energy intake (kcal/day)   |                             |                        |               |
| <1785                      | 108/668                     | 1.75 (0.97-3.16)       | 0.937         |
| ≥ 1785                     | 93/638                      | 1.69 (0.91-3.16)       |               |
| Comorbidity                |                             |                        |               |
| 0                          | 138/969                     | 1.74 (1.03-2.93)       | 0.961         |
| 1-4                        | 75/713                      | 1.70 (0.80-3.60)       |               |

Abbreviations: aHR: adjusted hazard ratio, CI: confidence interval.

Model 1: The model adjusted for age, sex, race, education, marital status, smoking status, energy intake, burden of comorbidities, history of more than 1 cancer (for survivors). For cancer survivors, the model was stratified by time elapse since cancer diagnosis. In each set of subgroups, factors used for stratification were not included in the multivariable model.

**Table S2.** Association between DXA measures of body composition and risk of non-cancer mortality in cancer survivors.

| Measures of body composition             | No. death/person-years | Age-adjusted HR (95% CI)<br>Model 1 | aHR (95% CI)<br>Model 2 | aHR (95% CI)<br>Model 3 |
|------------------------------------------|------------------------|-------------------------------------|-------------------------|-------------------------|
| <i>All-cause mortality</i>               |                        |                                     |                         |                         |
| <b>Total fat mass</b>                    |                        |                                     |                         |                         |
| Low                                      | 111/5318.3             | Ref                                 | Ref                     | Ref                     |
| Medium                                   | 165/5068.0             | 1.08 (0.84-1.39)                    | 1.12 (0.88-1.45)        | 1.13 (0.88-1.45)        |
| High                                     | 179/5043.4             | 1.43 (1.12-1.83)                    | 1.32 (1.02-1.71)        | 1.33 (1.03-1.72)        |
| <b>Appendicular skeletal muscle mass</b> |                        |                                     |                         |                         |
| Without sarcopenia                       | 170/8627.9             | Ref                                 | Ref                     | Ref                     |
| With sarcopenia                          | 99/2422.9              | 1.44 (1.11-1.87)                    | 1.44 (1.10-1.88)        | 1.46 (1.11-1.91)        |
